# Supplementary material for: Molecular Insights into New Particle Formation in Barcelona, Spain
Source: Copernicus journal article supplement (doi:10.5194/acp-2020-84), 2020-03-04
Supplement: Supplementary file 1 [file acp-2020-84-supplement.pdf]

1 **Supplementary Information**

2

3 **Molecular Insights into New Particle Formation in Barcelona, Spain**

4

5 **James Brean, David C.S. Beddows, Zongbo Shi, Brice Temime-**

6 **Roussel, Nicolas Marchand, Xavier Querol, Andrés Alastuey,**

7 **María Cruz Minguillón, and Roy M. Harrison**

8

9

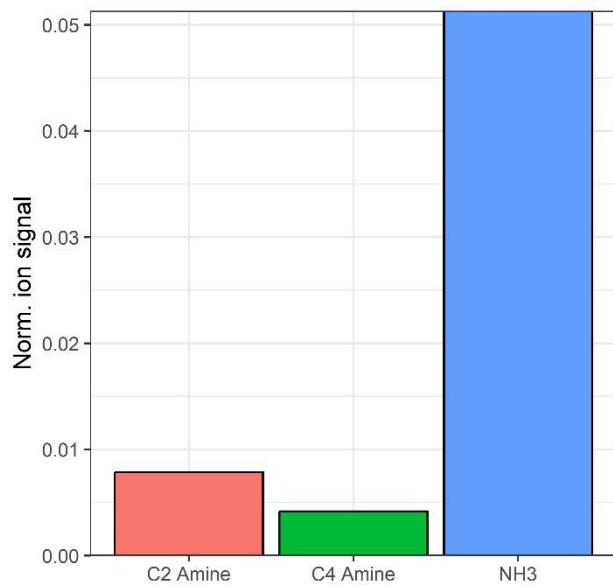

10

11 **Figure S1:** Mean ammonia and amine signals across the campaign as measured by CI-APi-ToF.  
12 Units of normalised ion counts.

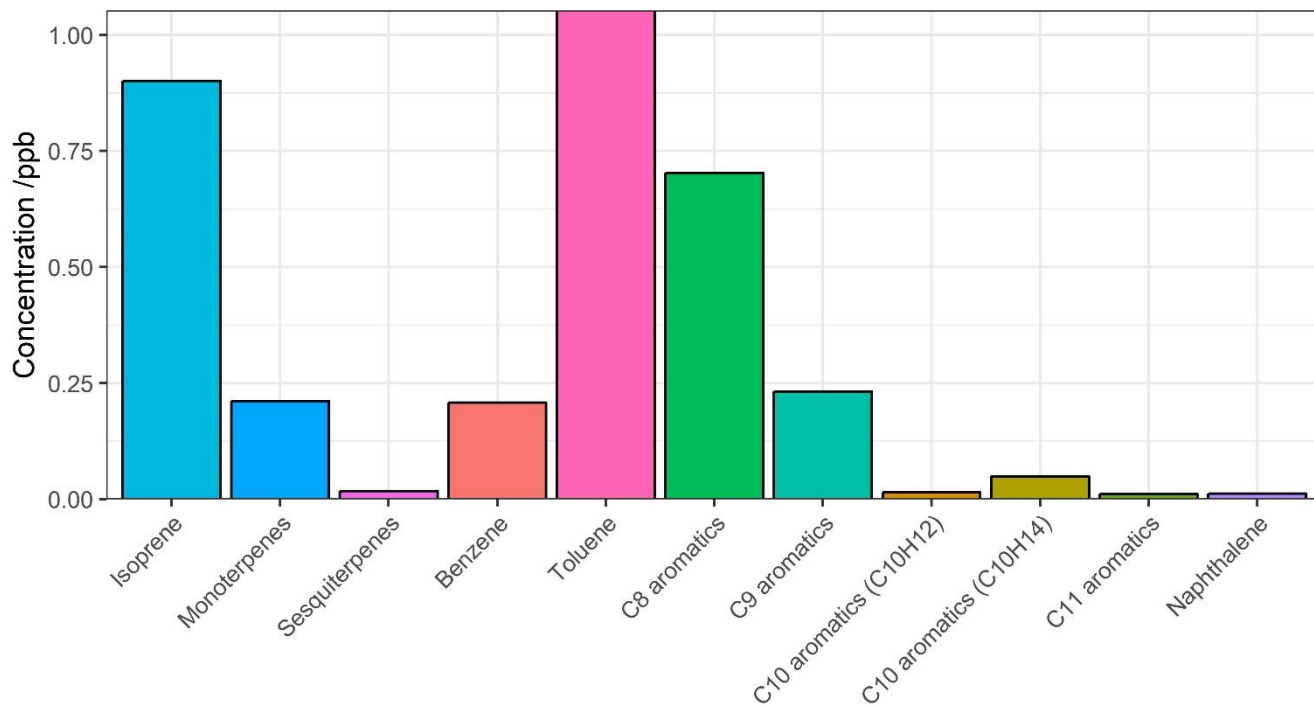

13

14 **Figure S2:** Mean selected VOC concentrations across the campaign as measured by PTR-ToF-MS.

15

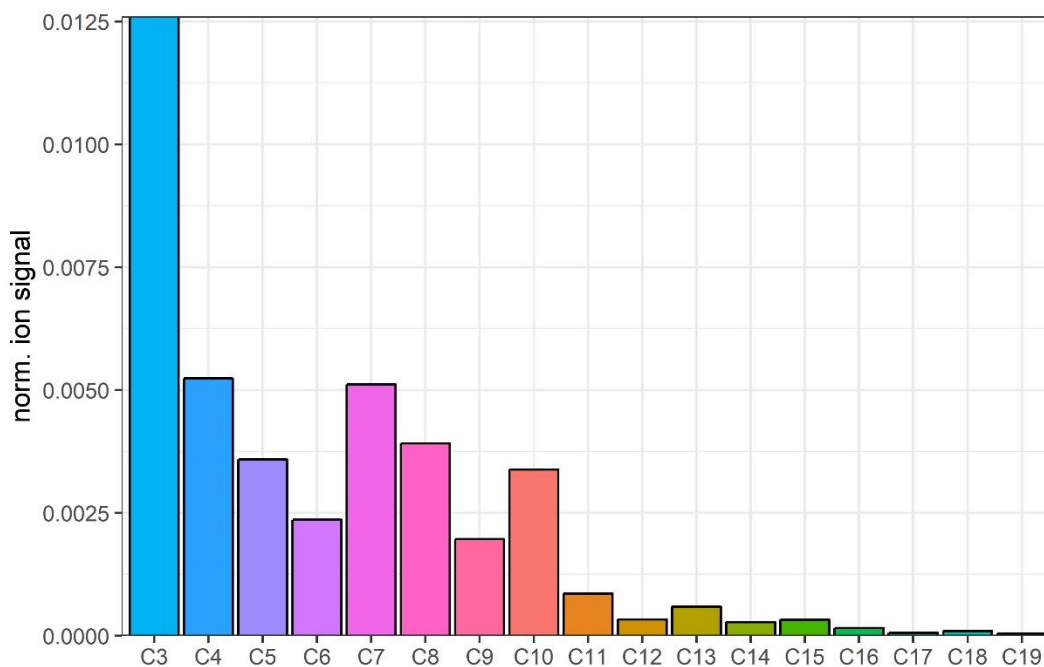

16

17 **Figure S3:** Mean ion signals per carbon number across the campaign as measured by CI-APi-ToF.  
 18 Units of normalised

19

ion counts.

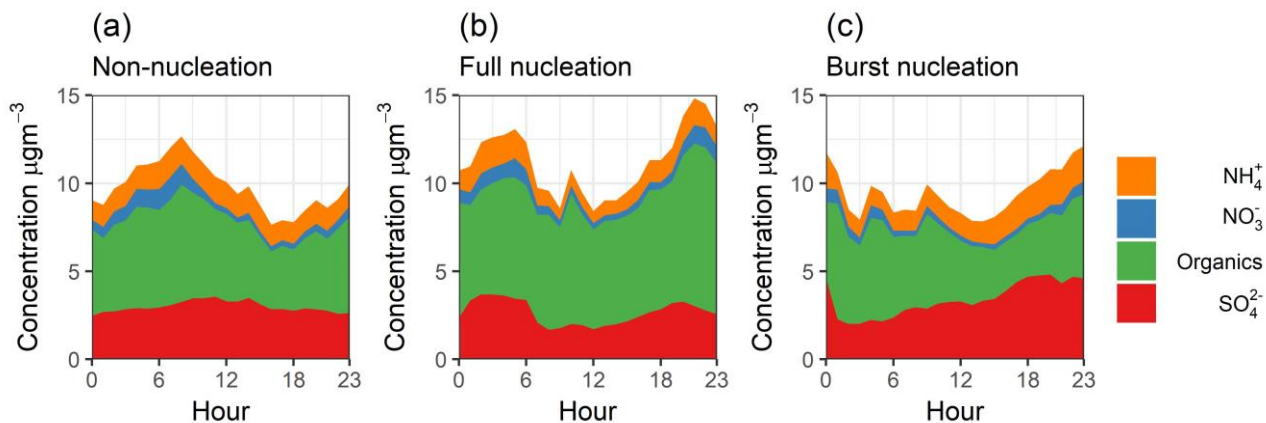

20

21 **Figure S4:** Average diurnals of particle composition as measured by ACSM on (a) non-nucleation,  
 22 (b) full-nucleation and (c) burst-nucleation days.

23

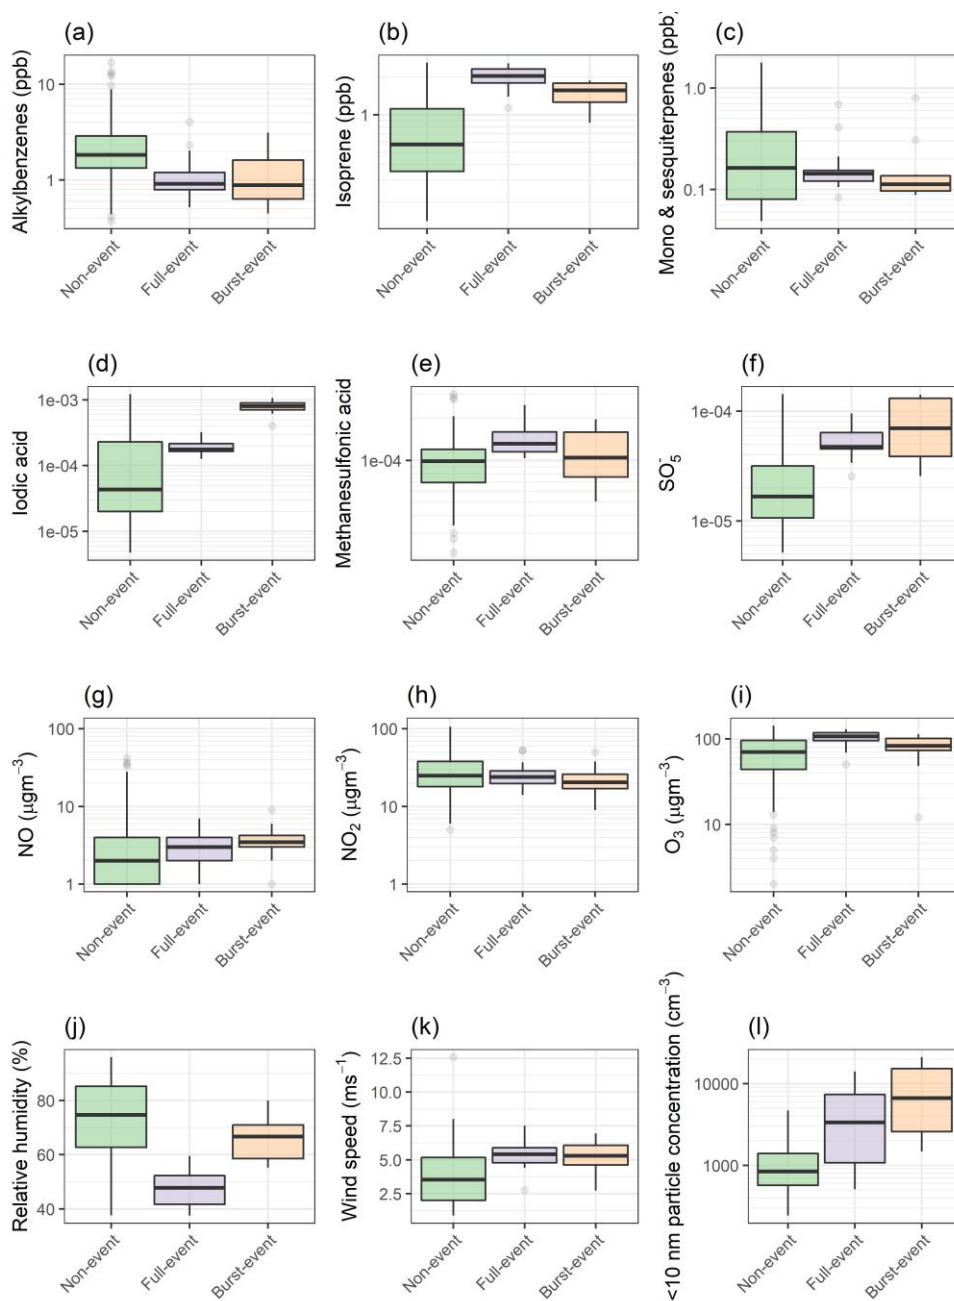

24

25 **Figure S5:** Box plots as figures 2 & 3 for (a-c) VOCs as measured by PTR-ToF-MS, (d-f) other  
 26 ions as measured by CI-APi-ToF (units of norm. counts) (g-i) trace gases, and (j-l) meteorological  
 27 and <10 nm particle count parameters.

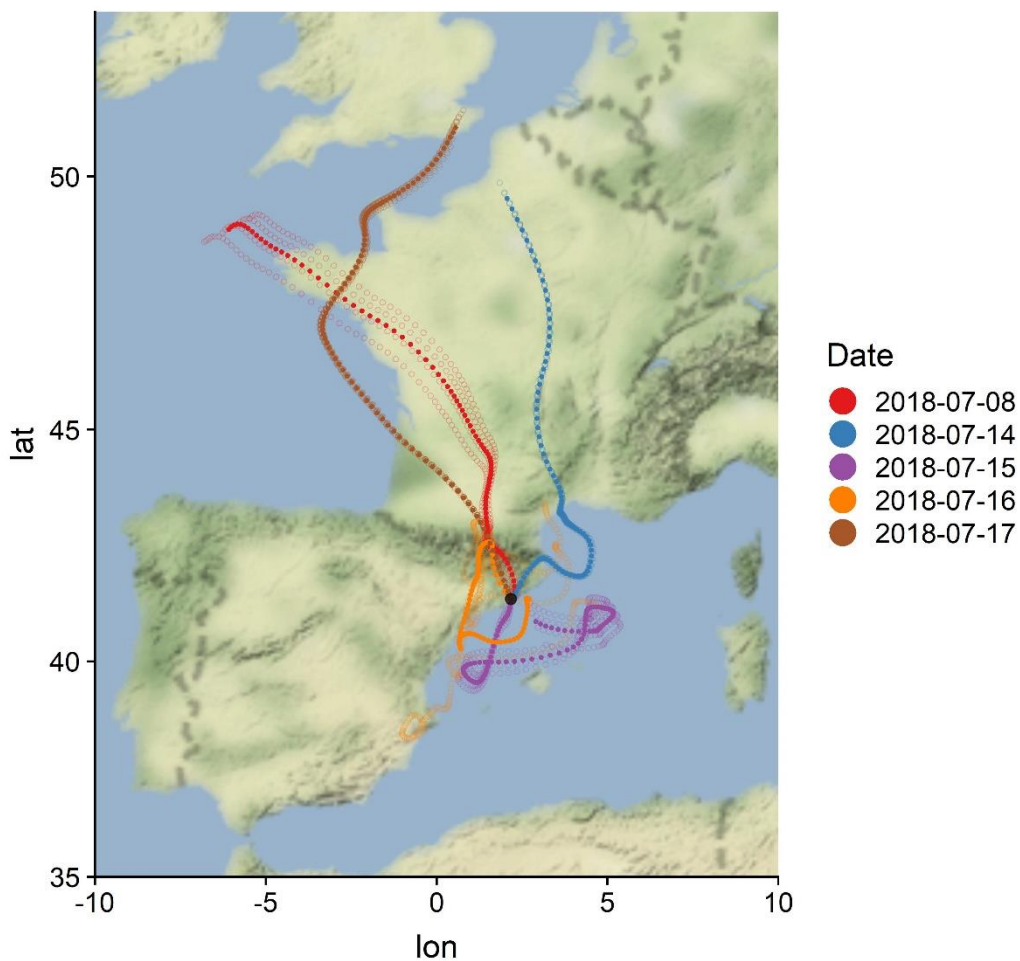

28

29 **Figure S6:** HYSPLIT 96 hour back trajectories per nucleation event. Dark dashed lines show mean  
 30 trajectory per event, light dashed lines show hourly trajectories from which mean is calculated.

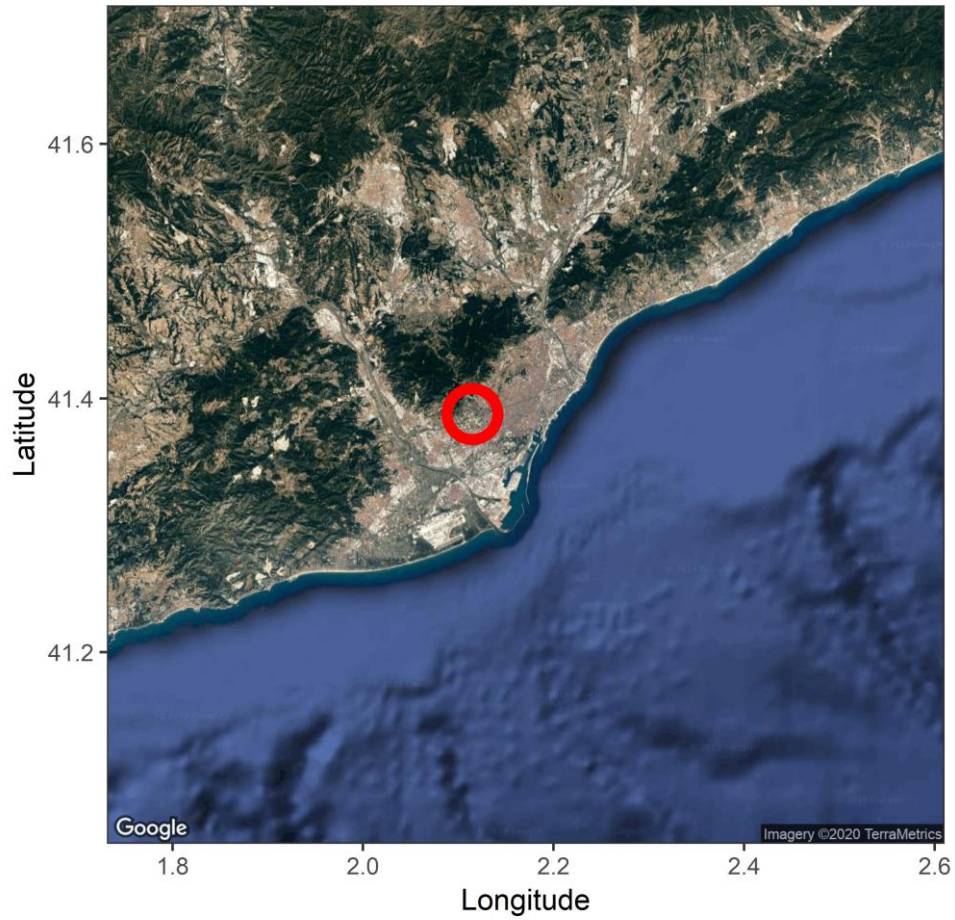

31

32 **Figure S7:** Location of sampling site.
